# Supplementary material for: Four-dimensional tracer flow reconstruction in fractured rock through borehole ground-penetrating radar (GPR) monitoring
Source: Copernicus journal article supplement (doi:10.5194/se-12-1497-2021), 2021-07-06
Supplement: Supplementary file 1 [file se-12-1497-2021-supplement.zip]

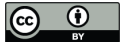

## *Supplement of*

# **Four-dimensional tracer flow reconstruction in fractured rock through borehole ground-penetrating radar (GPR) monitoring**

**Peter-Lasse Giertzuch et al.**

*Correspondence to:* Peter-Lasse Giertzuch ([peter-lasse.giertzuch@erdw.ethz.ch](mailto:peter-lasse.giertzuch@erdw.ethz.ch))

- [se-12-1497-2021-supplement-title-page.pdf](#)
- [3d\\_geo1.mkv](#)
- [3d\\_geo3.mkv](#)
- [refl\\_geo1.mkv](#)
- [refl\\_geo3.mkv](#)
- [trans.mkv](#)

The copyright of individual parts of the supplement might differ from the article licence.
